# Supplementary material
Source: PubMed Central journal article supplement (PMC5989757)

**Figure 3A**

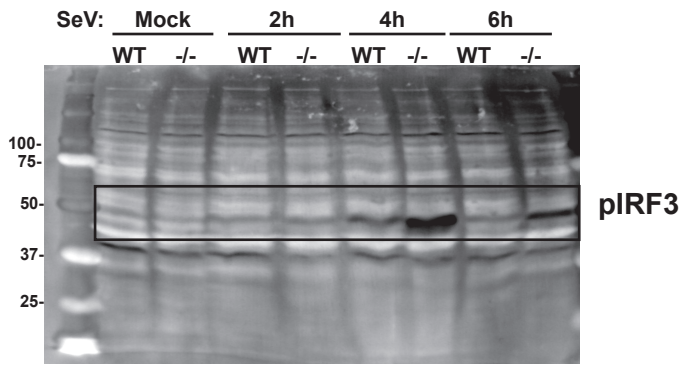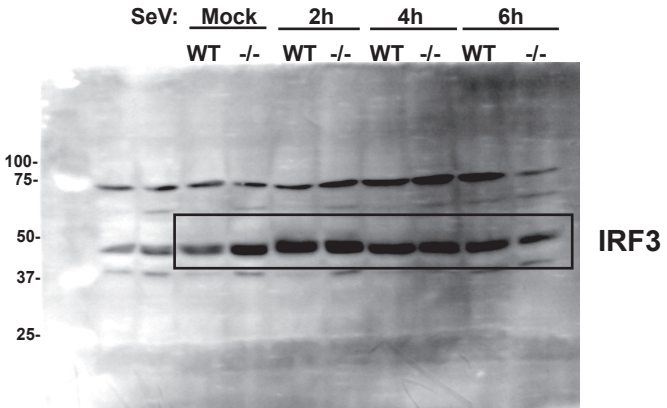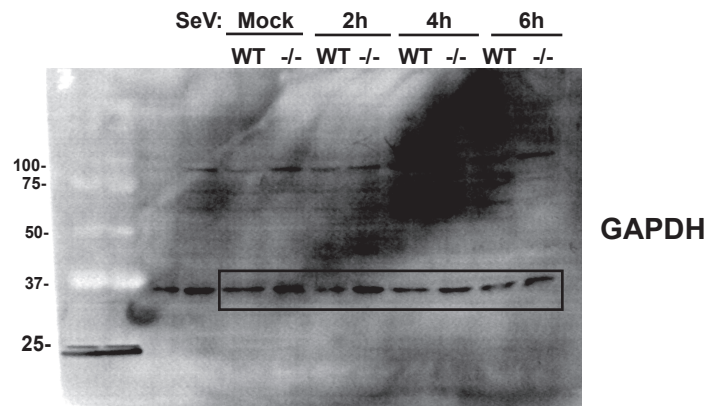

**Figure 3B**

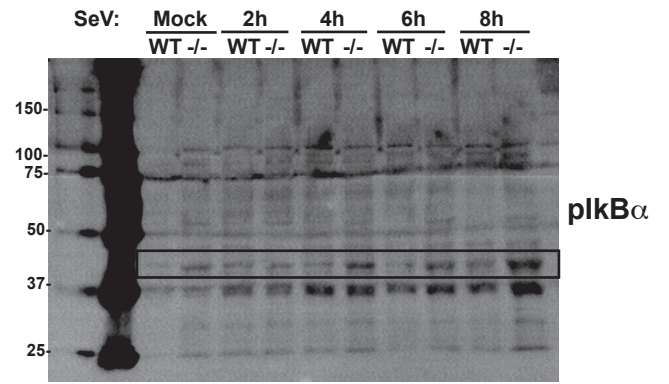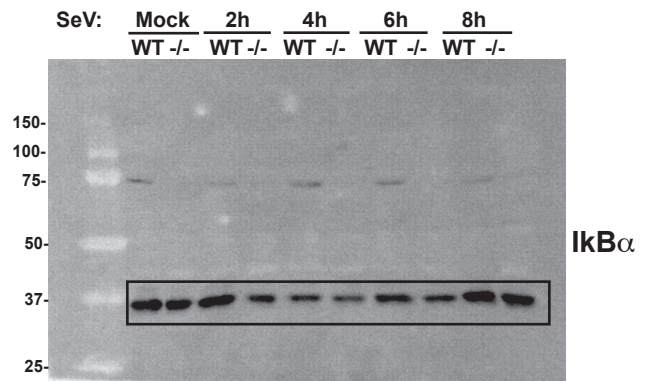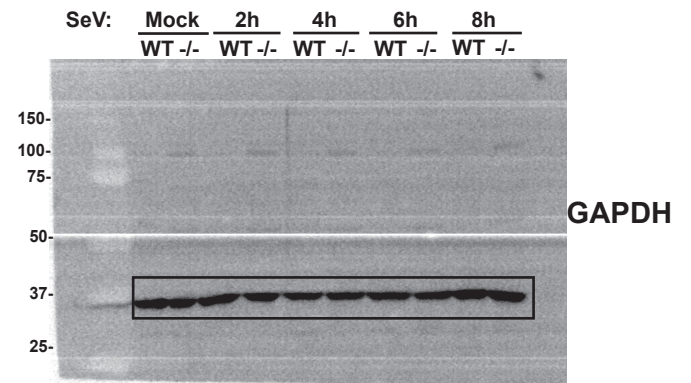

Figure 3C

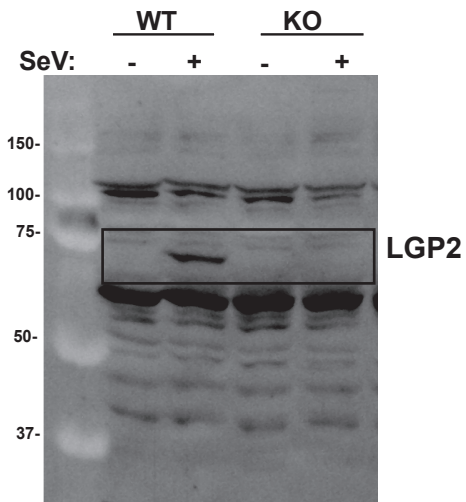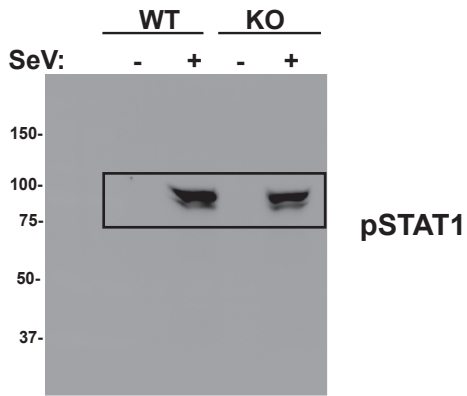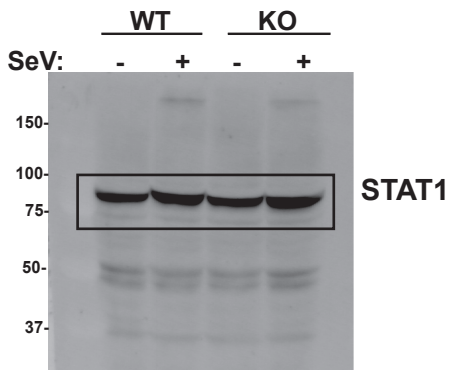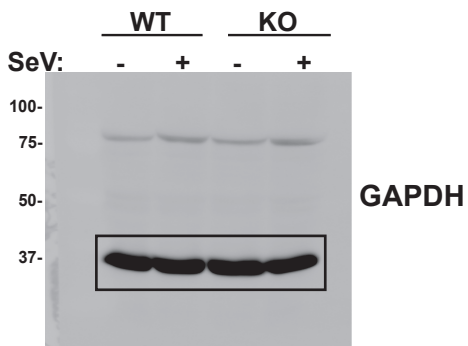

Figure 3D

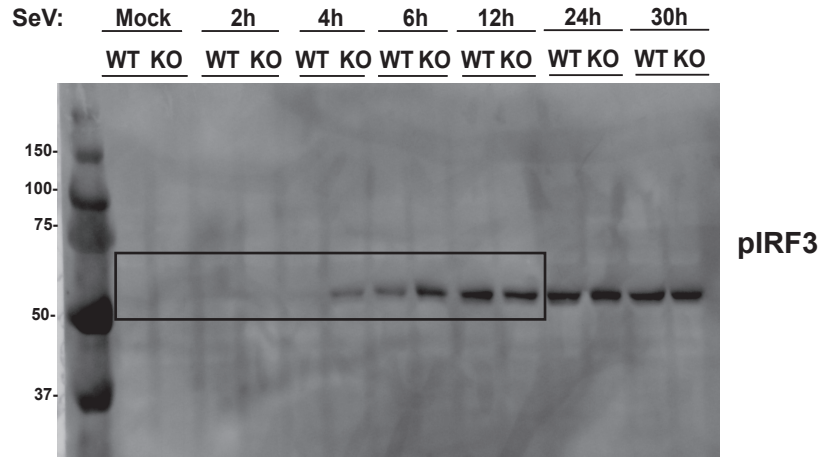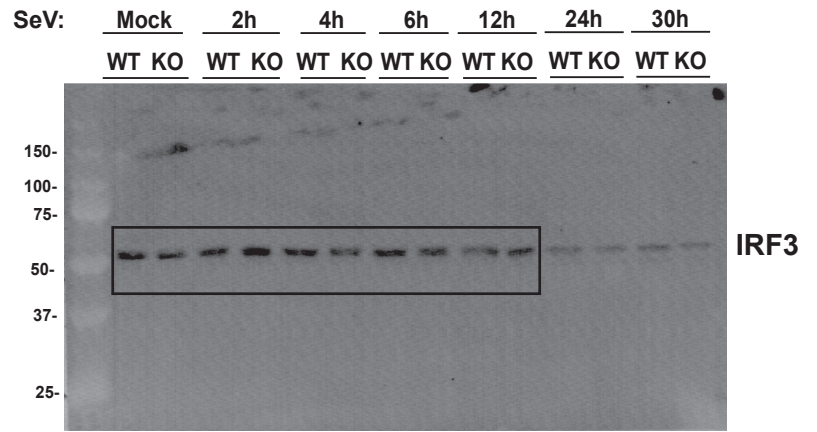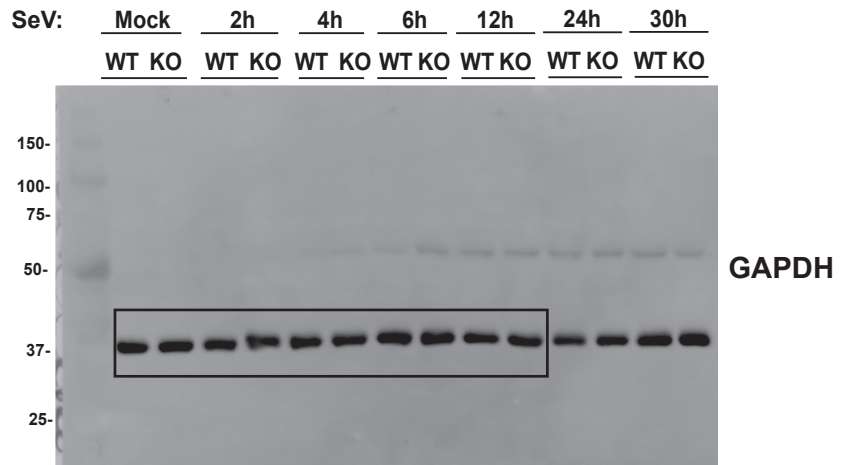

# Figure 3E

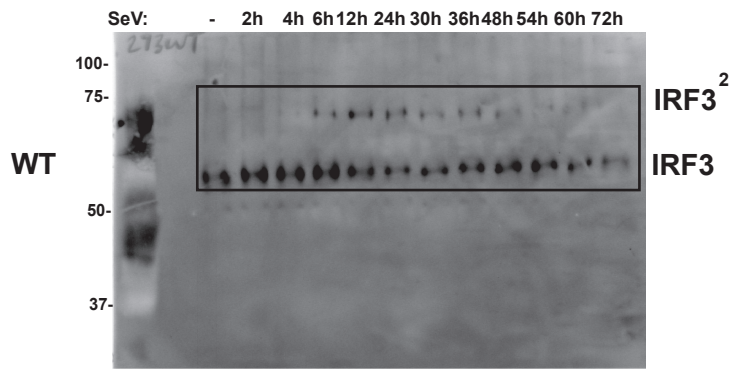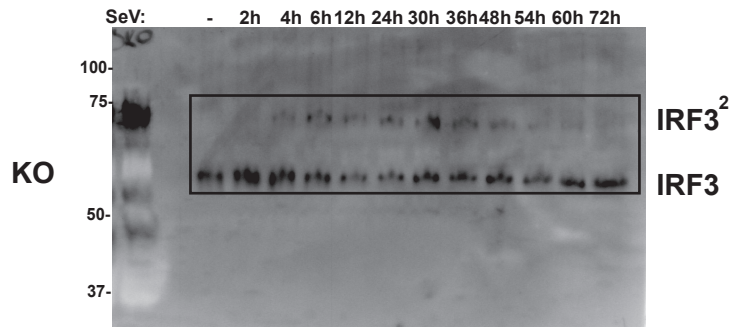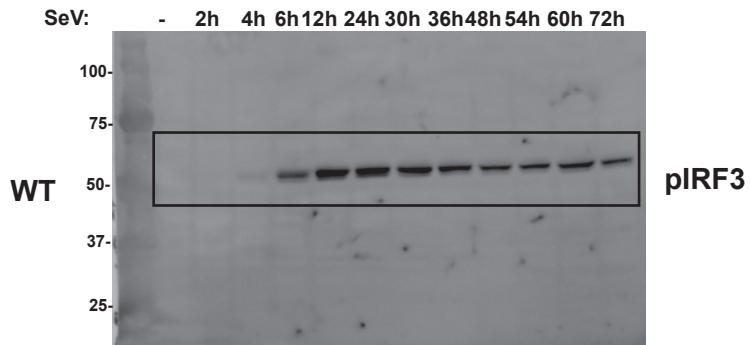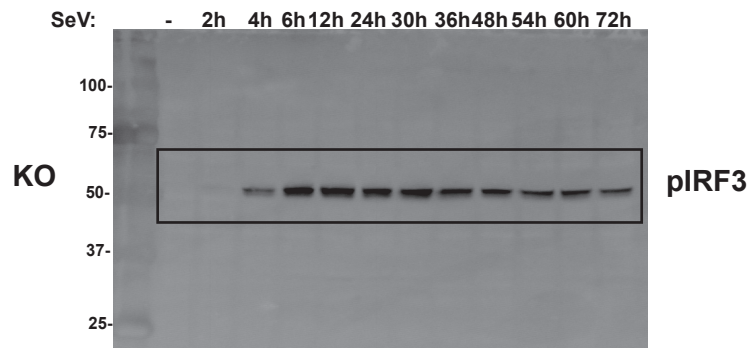

Supplement: EMBR-19-e45176-s002.pdf [file EMBR-19-e45176-s002.pdf]

**Fig 5B**

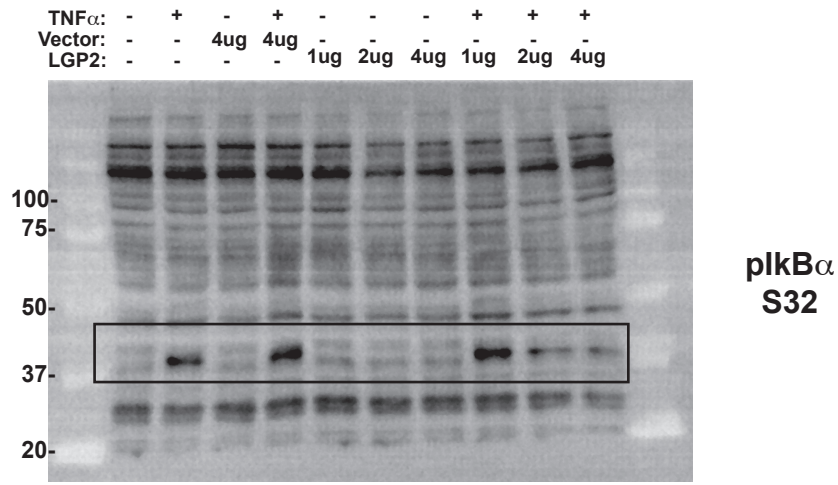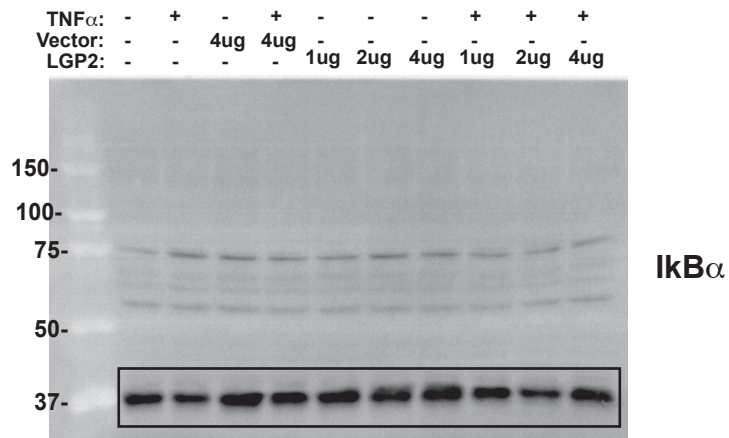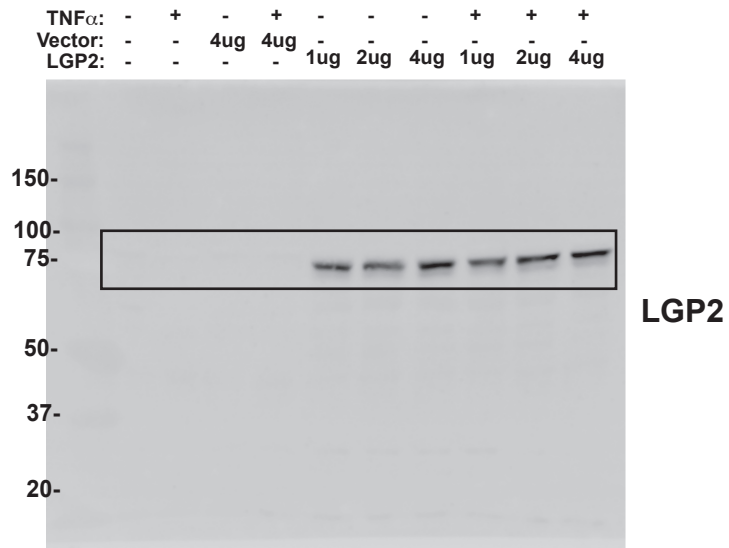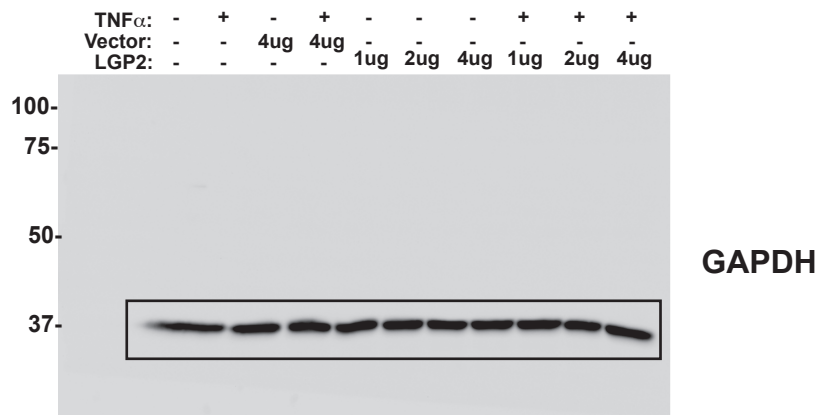

Supplement: EMBR-19-e45176-s003.pdf [file EMBR-19-e45176-s003.pdf]

**Figure 6B**

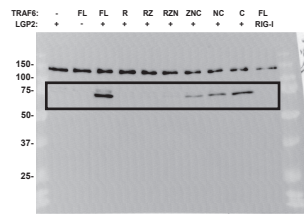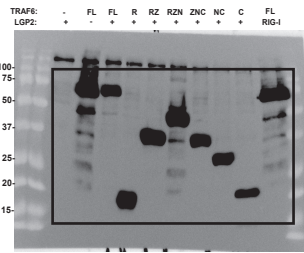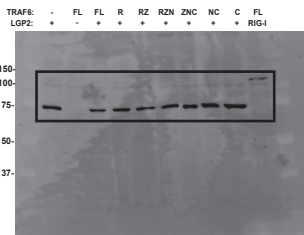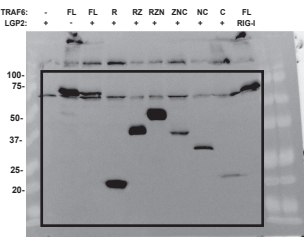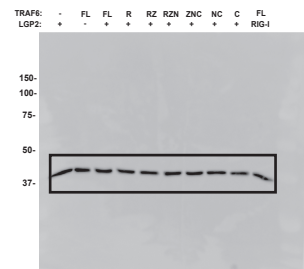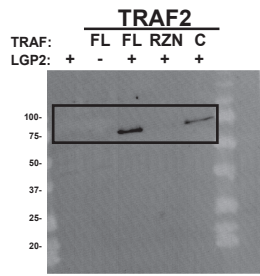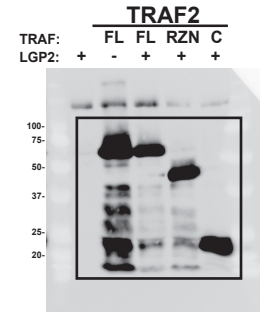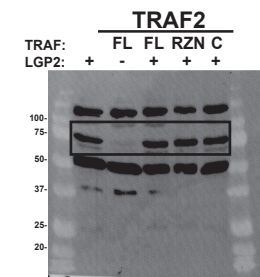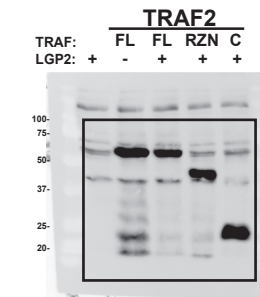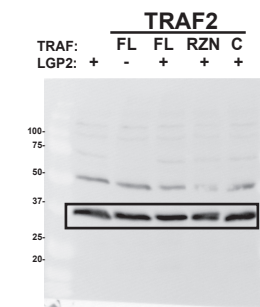

**Figure 6C**

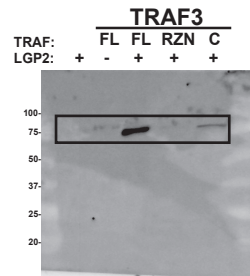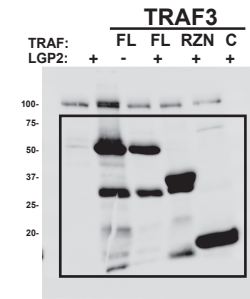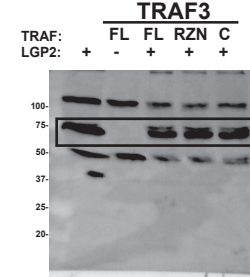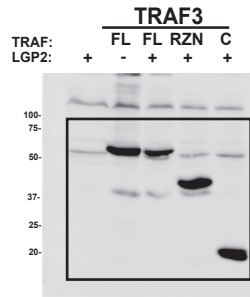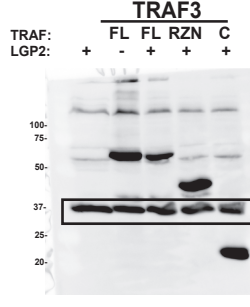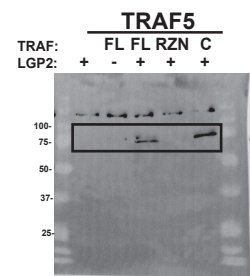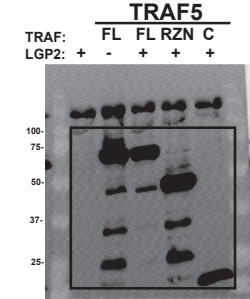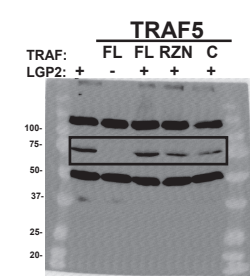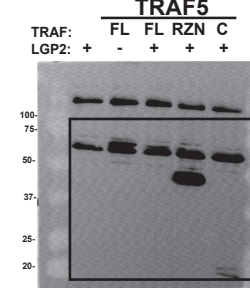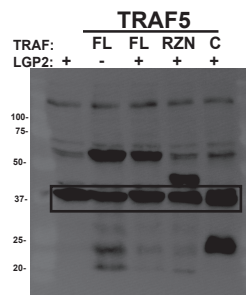

**LGP2**

**TRAF**

**LGP2**

**TRAF**

**GAPDH**

Supplement: EMBR-19-e45176-s004.pdf [file EMBR-19-e45176-s004.pdf]

Figure 7C

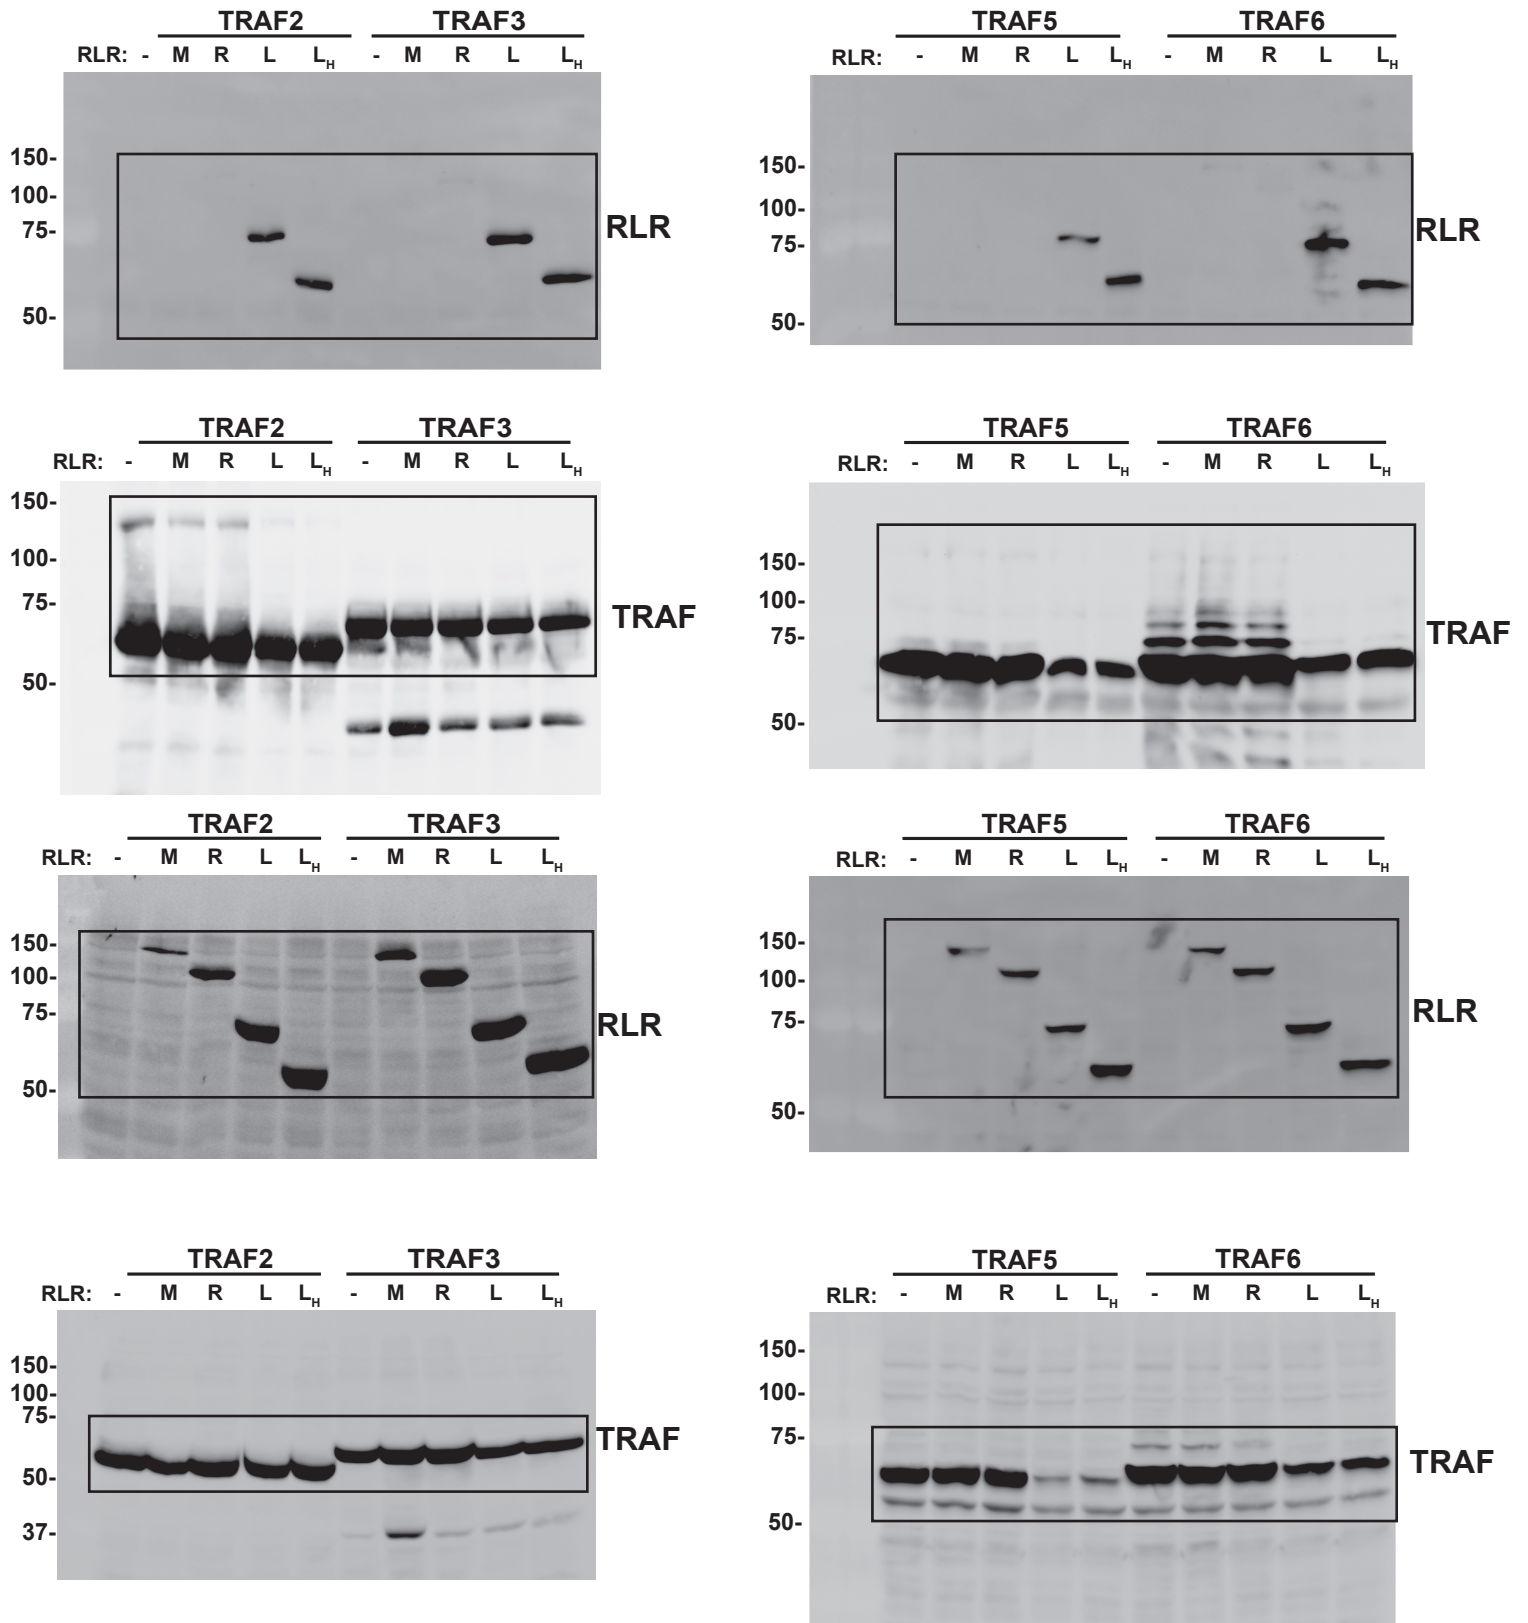

**Figure 7D**

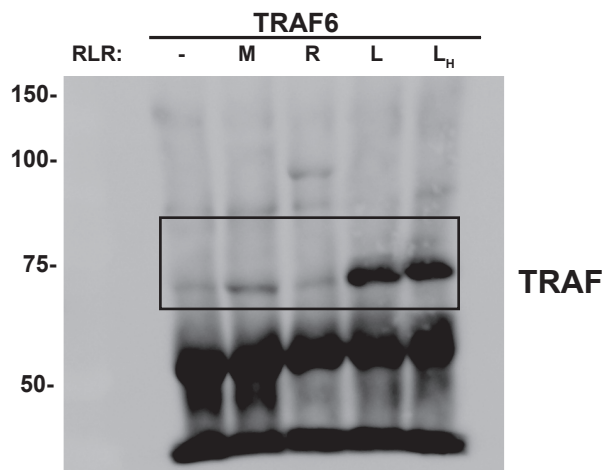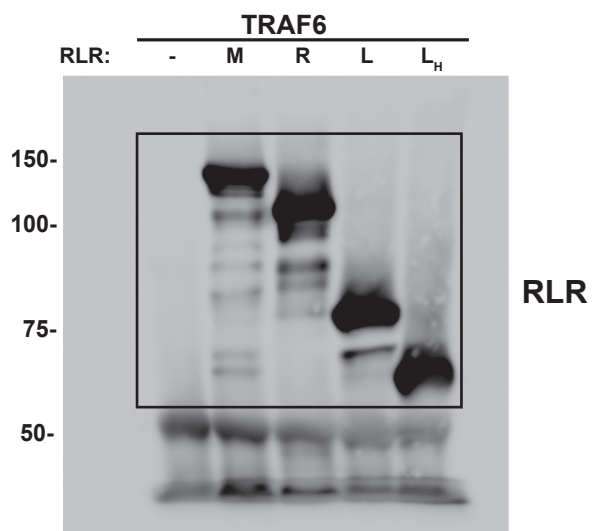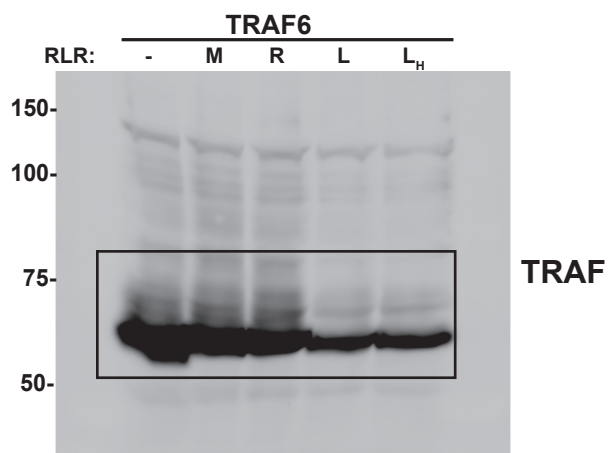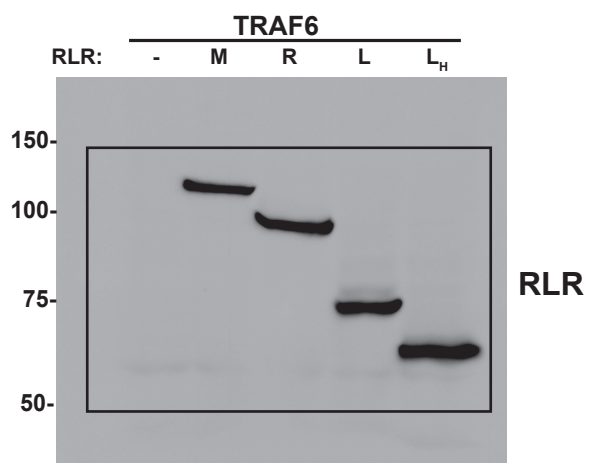

**Figure 7E**

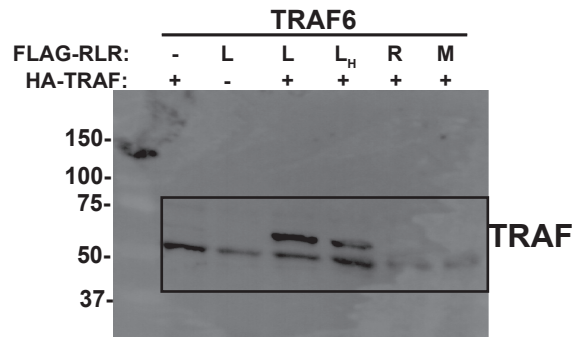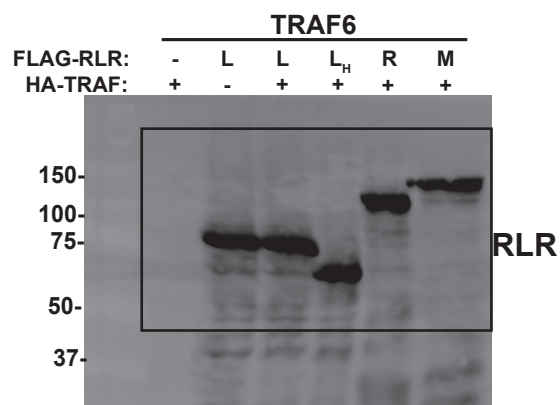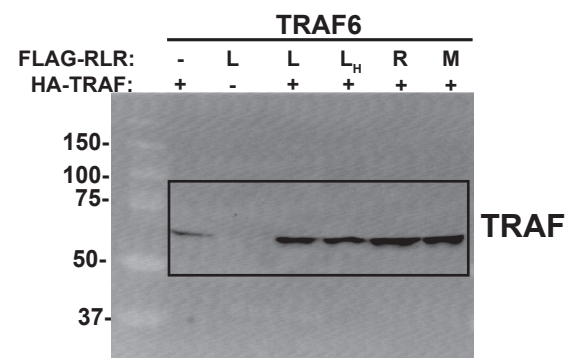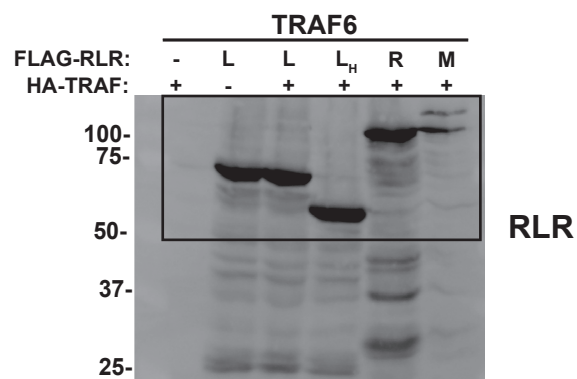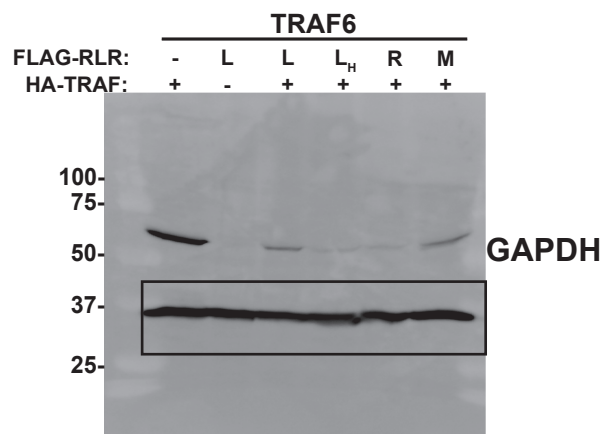

Supplement: EMBR-19-e45176-s005.pdf [file EMBR-19-e45176-s005.pdf]

Figure 8A

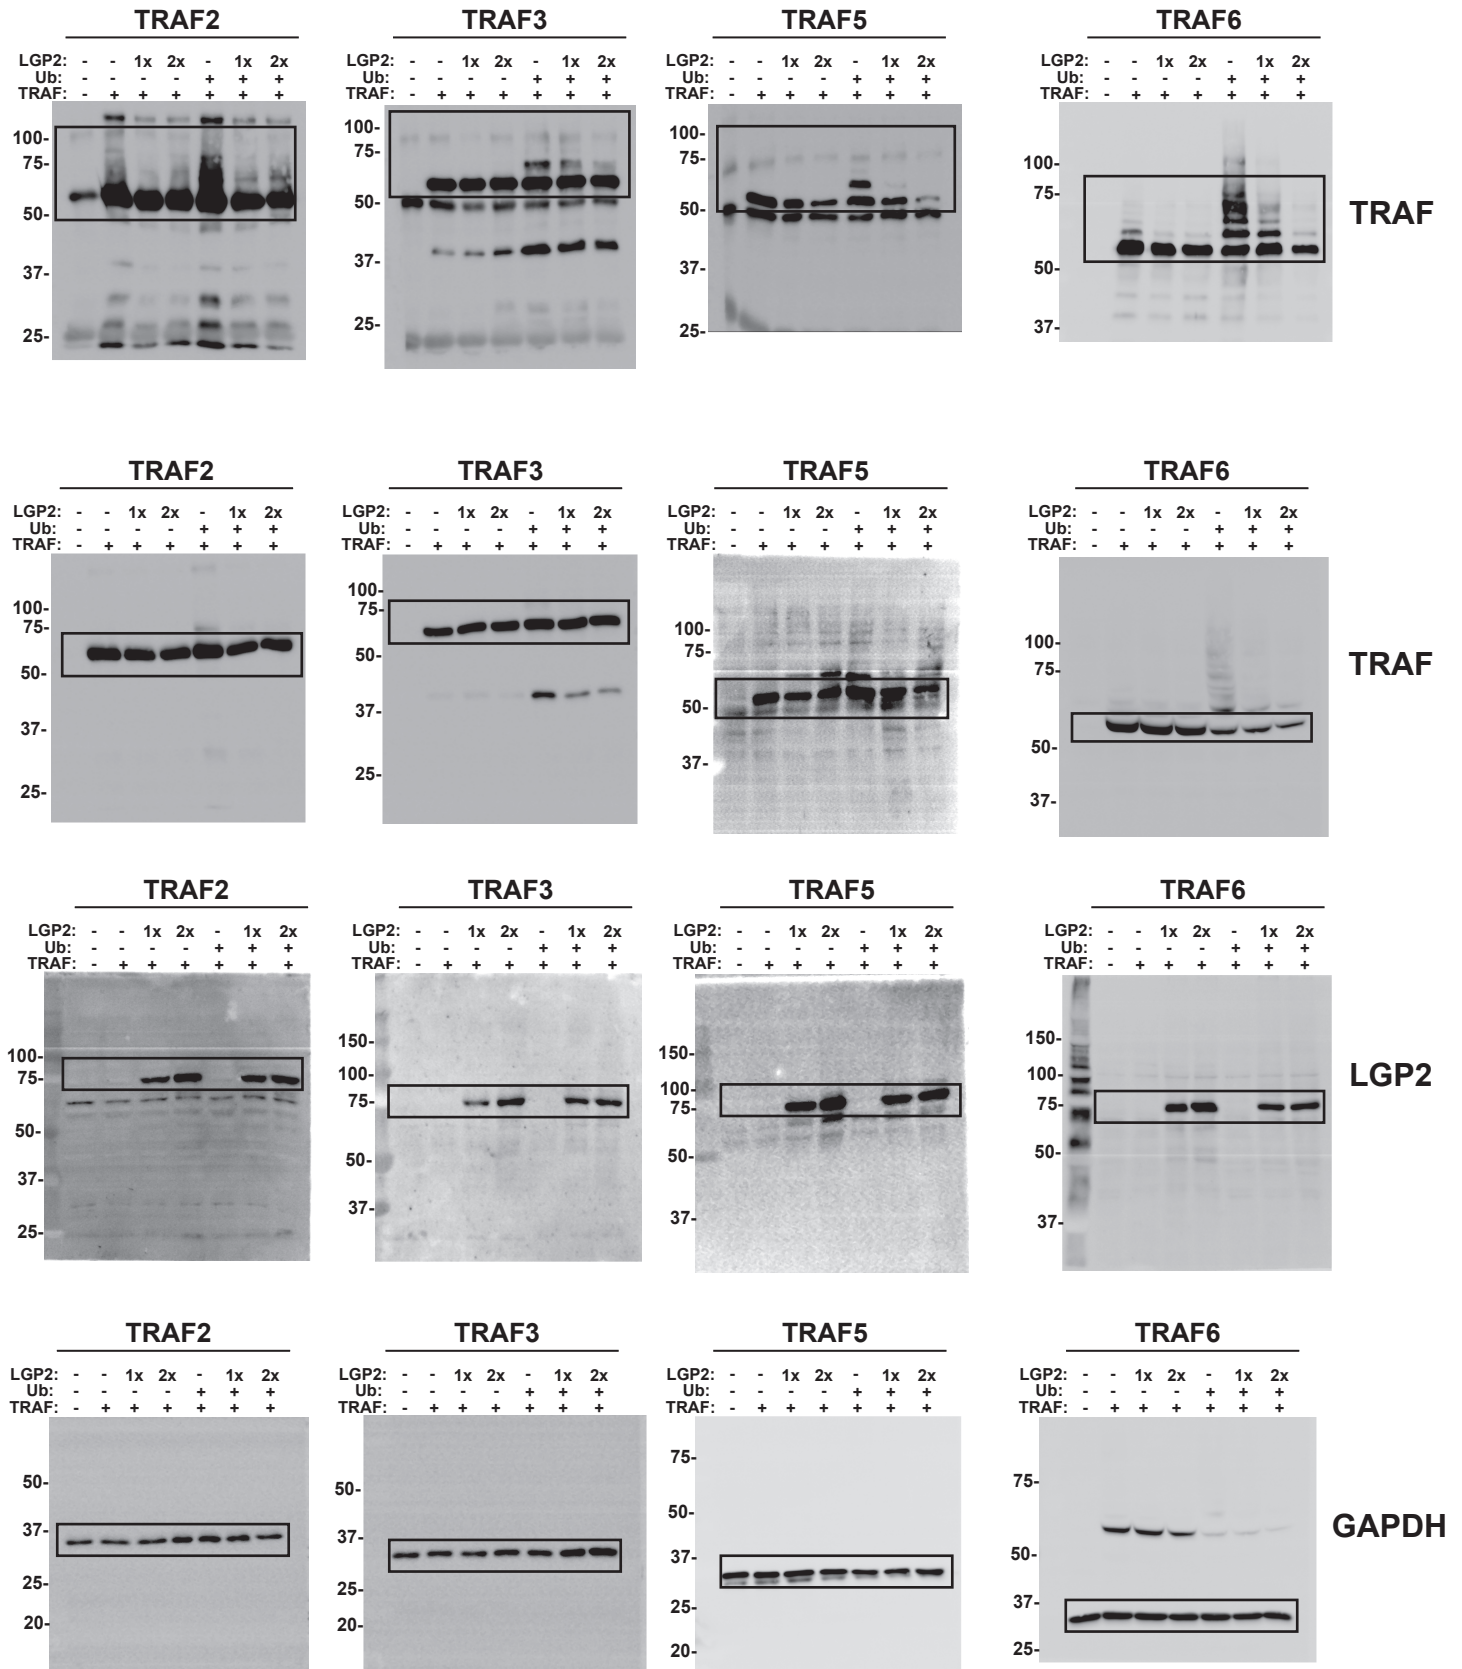

Figure 8B

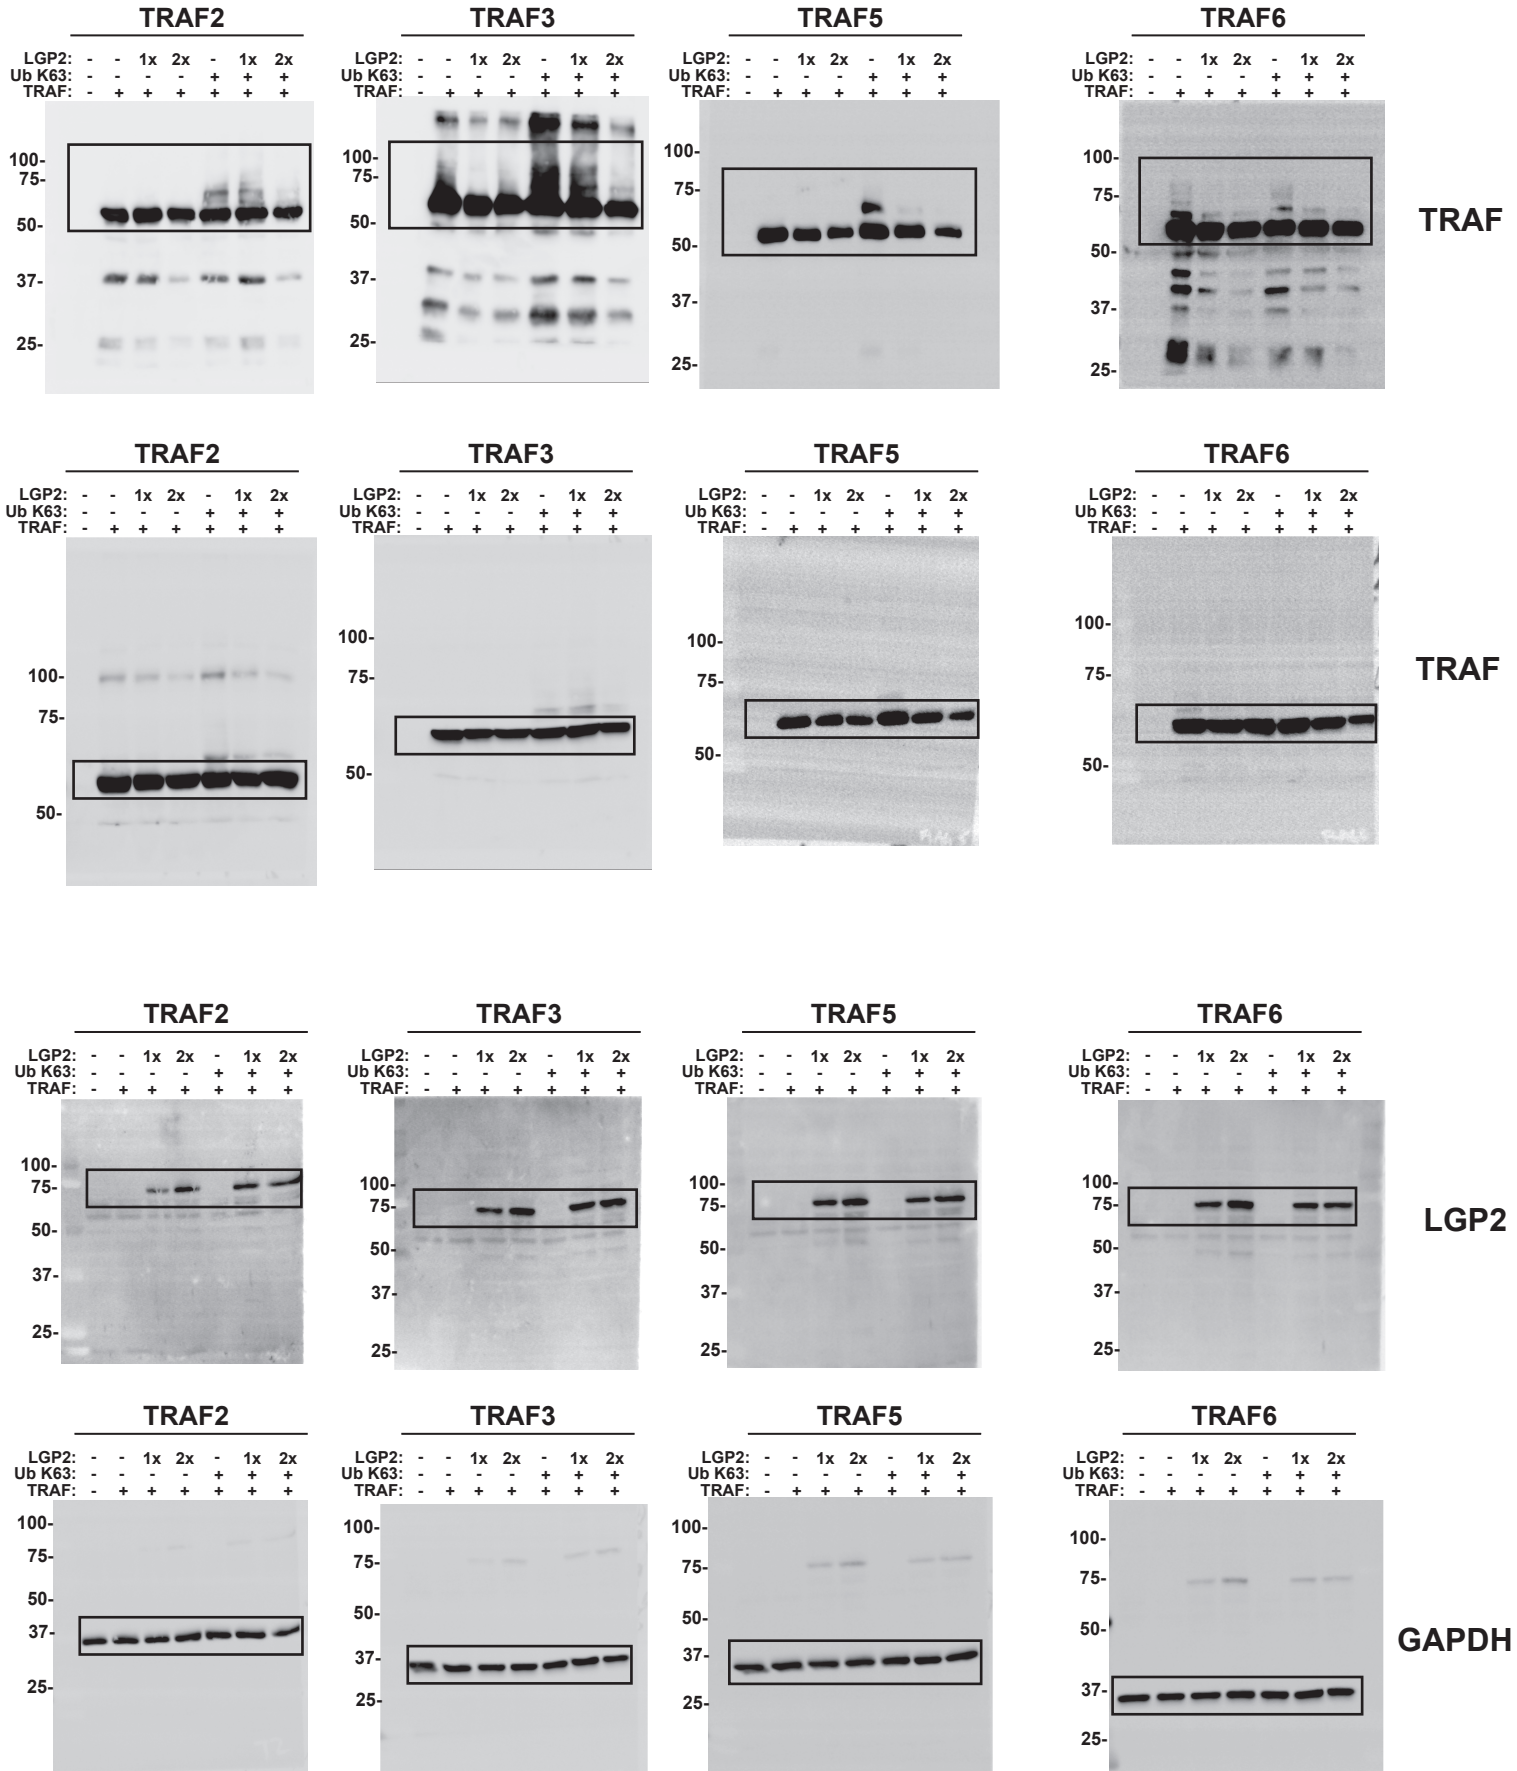

**Figure 8C**

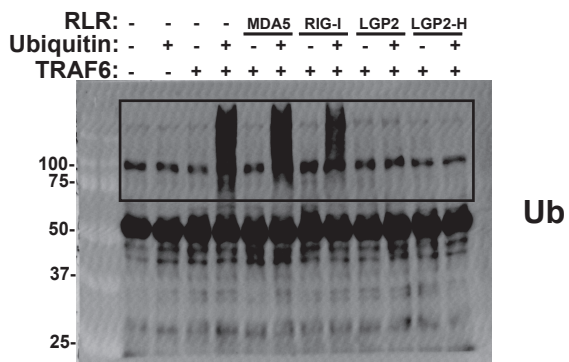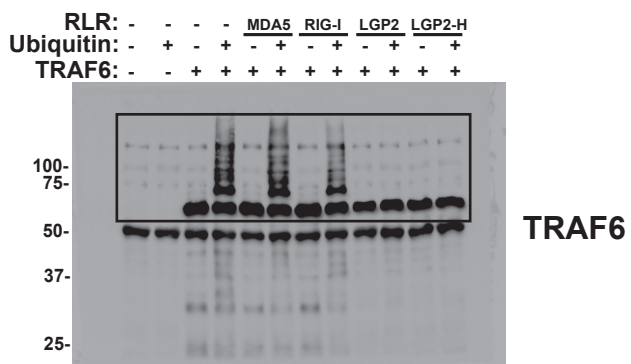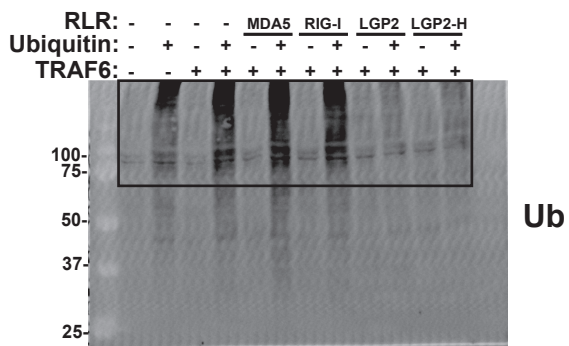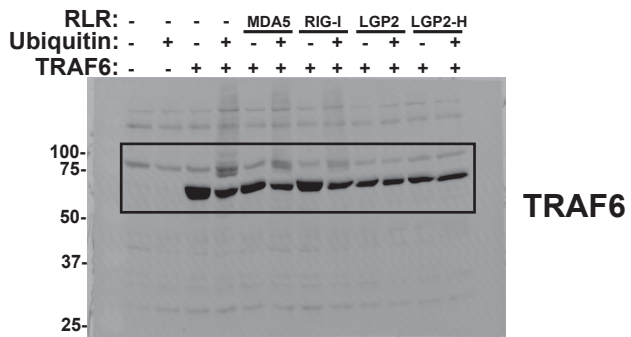

Supplement: EMBR-19-e45176-s006.pdf [file EMBR-19-e45176-s006.pdf]
